# Supplementary material for: Automatic Generation of Use Case Diagrams from English Specifications Document.
Source: Royal Society of Chemistry journal article supplement (doi:10.1039/d0nr07681c), 2007-01-01
Supplement: d0nr07681c1.pdf [file d0nr07681c1.pdf]

## Supporting Information

### **Core-Shell Gold Nanorod@Mesoporous-MOF Heterostructures for Combinational Phototherapy**

Zehao Zhou,<sup>†</sup> Jian Zhao, Zhenghan Di, Bei Liu, Zhaohui Li, Xuemin Wu\* and Lele Li\*

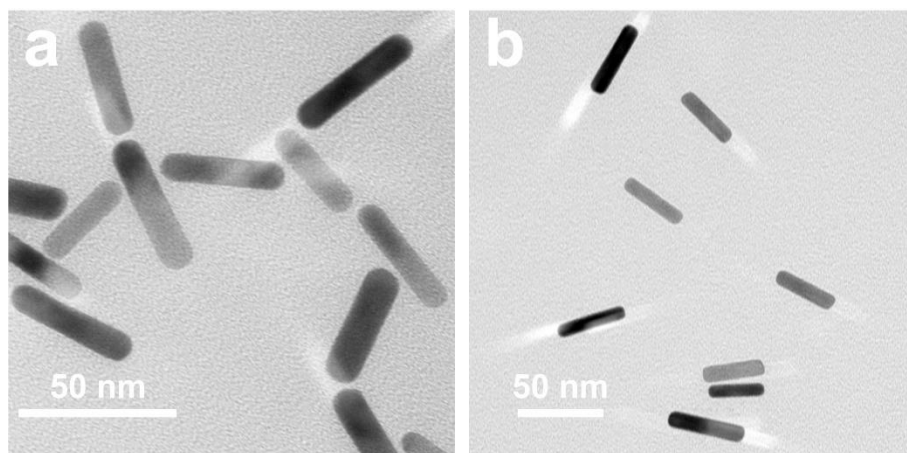

**Figure S1.** TEM images of the AuNRs coated with PVP and dispersed in (a) water and (b) DMF.

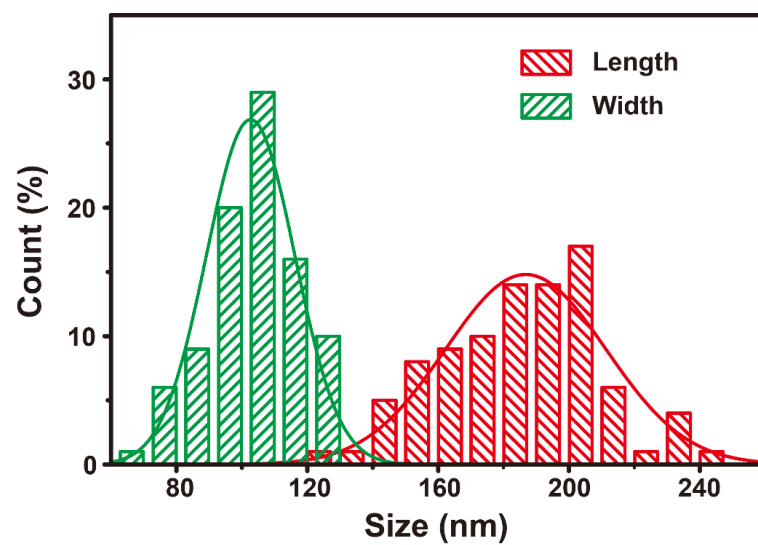

**Figure S2.** Size distribution of the AuNR@MOFs.

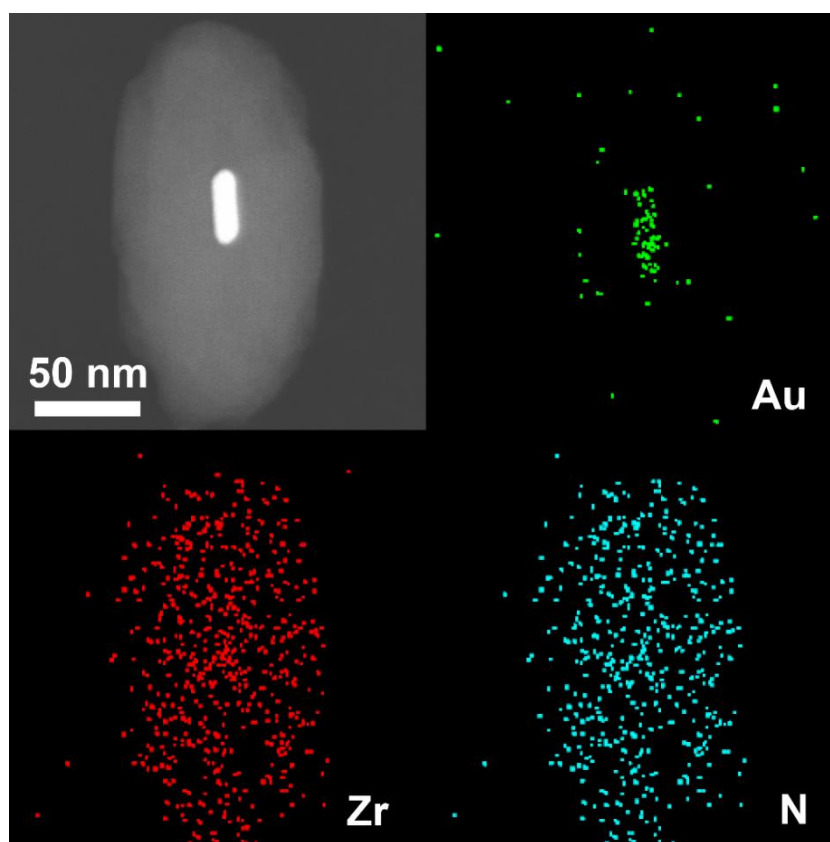

**Figure S3.** HAADF-STEM image and the corresponding STEM-EDS elemental mapping images (green for Au, red for Zr and cyan for N) of a single AuNR@MOFs nanoparticle.

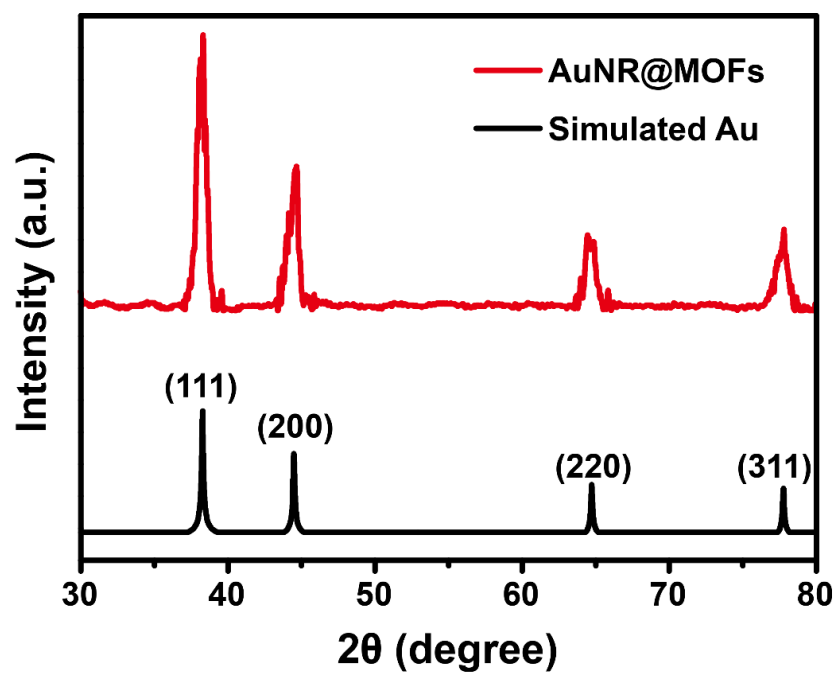

**Figure S4.** PXRD patterns of AuNR@MOFs and corresponding simulation result.

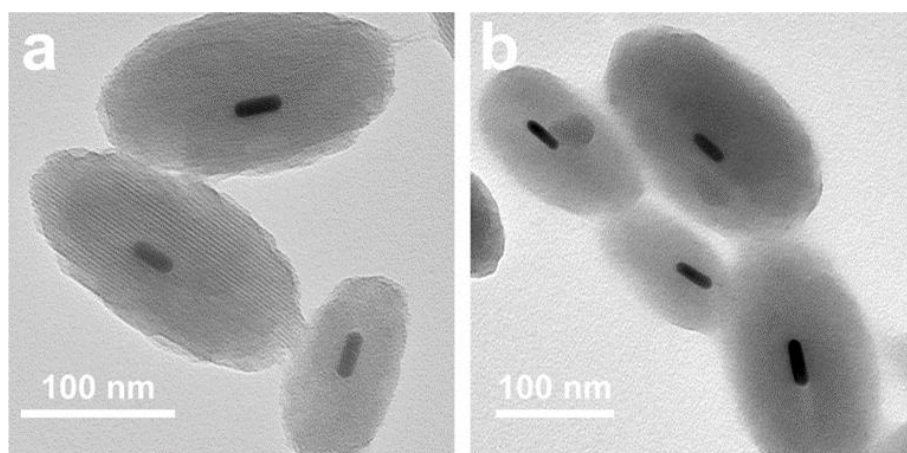

**Figure S5.** TEM images of AuNR@MOFs incubated in water (pH = 7.4) for (a) 0 h and (b) 24 h, respectively.

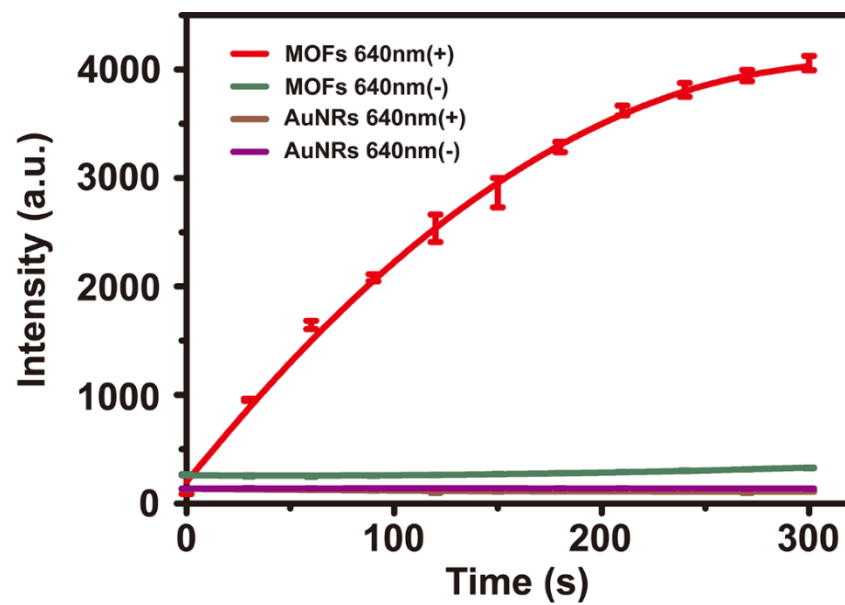

**Figure S6.** Singlet oxygen generation by MOF NPs and PVP-AuNRs with (+) and without (-) 640 nm irradiation ( $20 \text{ mW/cm}^2$ ), detected by SOSG assay. Data are means  $\pm$  SD ( $N = 3$ ).

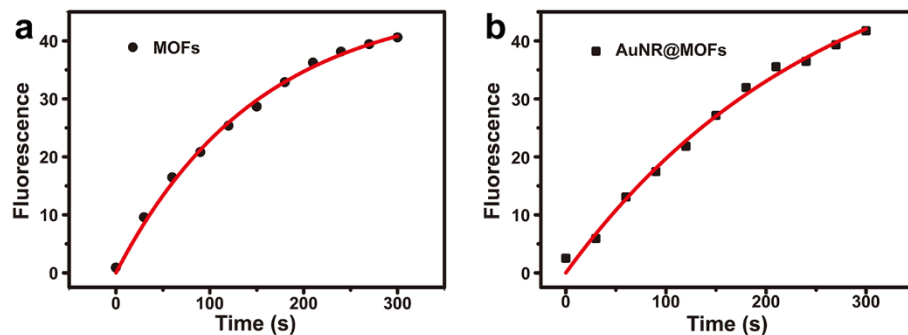

**Figure S7.** Singlet oxygen generation by (a) MOFs and (b) AuNR@MOFs, respectively. The dots are experimental data and solid lines are fitting curves.

Following Lu's report.<sup>[1]</sup> The singlet oxygen generation curve was fitted with the following equation (1):

$$I_F = A(1 - e^{-kt}) \quad (1)$$

Where  $I_F$  is fluorescence intensity of SOSG and  $t$  is irradiation time,  $A$  and  $k$  are fitting parameters. The product of  $Ak$  represents the singlet oxygen generation efficiency. In our experiment, the singlet oxygen generation efficiency of MOFs and AuNR@MOFs were calculated as  $0.3128 \text{ S}^{-1}$  and  $0.2377 \text{ S}^{-1}$ , respectively, indicating that the singlets oxygen generation efficiency of MOFs is about 1.3 times higher than that of AuNR@MOFs.



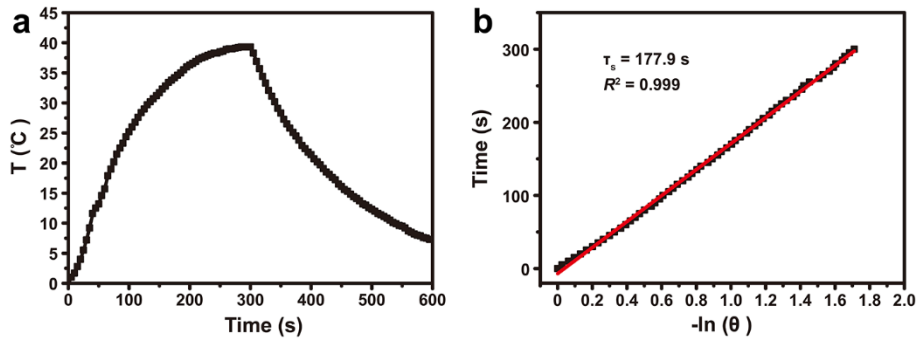

**Figure S8.** (a) Photothermal effect of AuNR@MOFs aqueous solution (200  $\mu\text{L}$ , 1.4 mg/mL) under irradiation of 808 nm laser with the power density of 0.75 mW/cm<sup>2</sup> and shutting of laser after irradiation for 300 s. (b) Time constant for heat transfer from the system is determined to be  $\tau_s = 177.9$  s by applying the linear time data from the cooling period of (a) versus negative logarithm of the driving force temperature.

Following Roper's report,<sup>[2]</sup> the photothermal conversion efficiency ( $\eta$ ) was calculated using equation (2):

$$\eta = \frac{hA(T_{\max} - T_{\text{amb}}) - Q_0}{I(1 - 10^{-A_\lambda})} \quad (2)$$

Where  $h$  is heat transfer coefficient (mW/(m<sup>2</sup> °C)),  $A$  is the surface area of the container (m<sup>2</sup>),  $T_{\max}$  is the equilibrium temperature (°C),  $T_{\text{amb}}$  is ambient temperature of the surroundings (°C). According to the Figure S8a,  $T_{\max} - T_{\text{amb}}$  is 39.3 °C.  $Q_0$  is the heat from light absorbed by the water and cuvette sample walls (mW), and it was measured approximately 17 mW.  $I$  is the incident laser power (750 mW) and  $A_\lambda$  is the absorbance at an excitation wavelength of 808 nm. In our experiment,  $A_\lambda$  is so large that  $10^{-A_\lambda}$  is close to zero.

In order to get  $hA$ ,  $\theta$  is introduced according to the equation (3):

$$\theta = \frac{T - T_{\text{amb}}}{T_{\max} - T_{\text{amb}}} \quad (3)$$

And we also introduced  $\tau_s$  as the sample system time constant:

$$\tau_s = \frac{m_D C_D}{hA} \quad (4)$$

In equation (4),  $m_D$  represents the sample mass (0.2 g) and heat capacity of water used as solvent (4.2 J/g) respectively.

And  $\tau_s$  is calculated by using equation (5):

$$t = -\tau_s \ln(\theta) \quad (5)$$

Where  $t$  represents the cooling time, and the equation (4) is the fitting curve of Figure S8b.  $\tau_s$  is 177.9 s and  $hA$  is 0.00472 W/K.

Finally, the photothermal conversion efficiency of AuNR@MOFs is calculated as 22.5%.

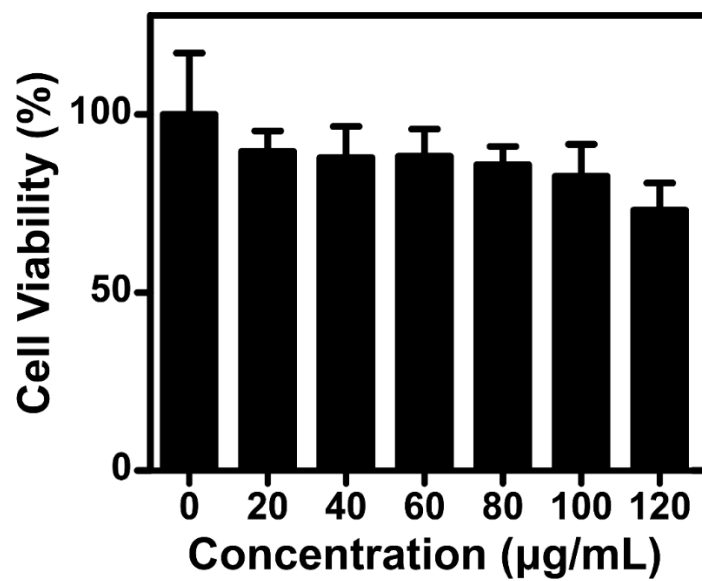

**Figure S9.** Cell viability of 4T1 cells with treatment of AuNR@MOFs of different concentration. Data are means  $\pm$  SD; N = 4.

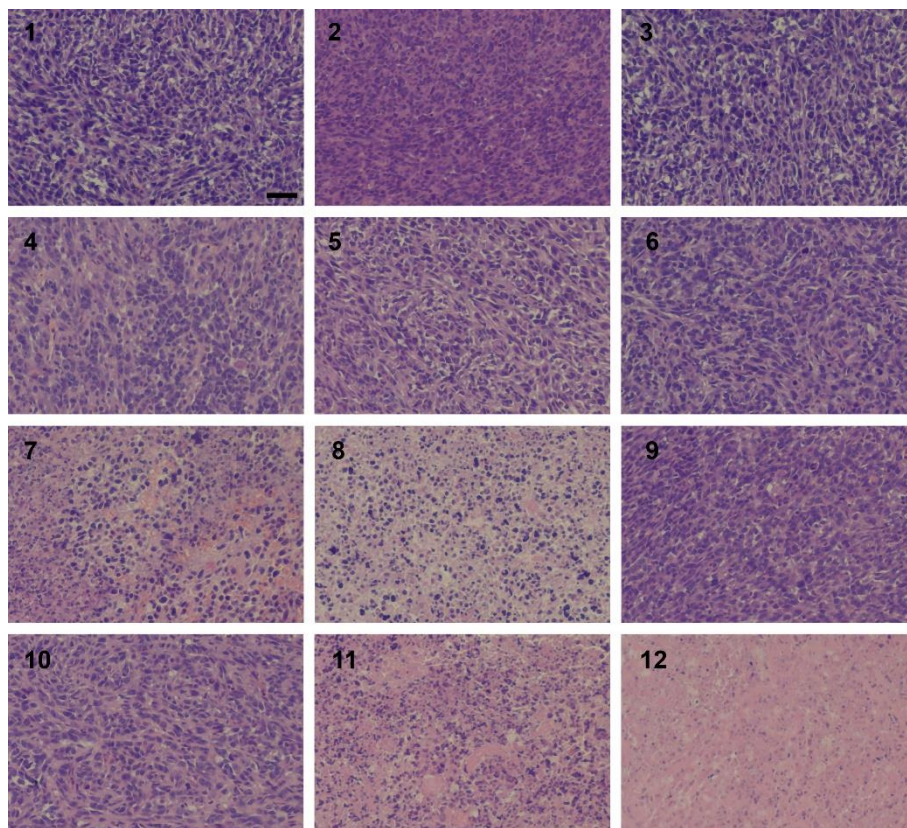

**Figure S10.** Representative H&E stained tumor sections after different treatments (1: Saline, 2: Saline + 640 nm + 808 nm, 3: PVP-AuNRs, 4: PVP-AuNRs + 808 nm, 5: PVP-AuNRs + 640 nm + 808 nm, 6: MOF NPs, 7: MOF NPs + 640 nm, 8: MOF NPs + 640 nm + 808 nm, 9: AuNR@MOFs, 10: AuNR@MOFs + 640 nm, 11: AuNR@MOFs + 808 nm, 12: AuNR@MOFs + 640 nm + 808 nm). Scale bars = 100  $\mu$ m.

## References

- 1 K. Lu, C. He and W. Lin, *J. Am. Chem. Soc.*, 2014, **136**, 16712-16715.
- 2 D. K. Roper, W. Ahn and M. Hoepfner, *J. Phys. Chem. C*, 2007, **111**, 3636-3641.
